# Supplementary material for: A resorufin-based fluorescence probe for visualizing biogenic amines in cells and zebrafish
Source: Royal Society of Chemistry journal article supplement (doi:10.1039/d2ra06482k), 2022-01-01
Supplement: d2ra06482k1.pdf [file d2ra06482k1.pdf]

## Electronic Supplementary Information

### A resorufin-based fluorescence probe for visualizing biogenic amines in cells and zebrafish

Sheng-Lin Pei,<sup>1</sup> Jin Zhang,<sup>2</sup> Wanyun Ge,<sup>1</sup> Chao Liu,<sup>1</sup> Ruilong Sheng,<sup>3</sup> Lintao Zeng,<sup>2,\*</sup>  
Ling-Hui Pan<sup>1,\*</sup>

<sup>1</sup> Department of Anesthesiology, Guangxi Medical University Cancer Hospital; Guangxi Clinical Research Center for Anesthesiology; Guangxi Engineering Research Center for Tissue & Organ Injury and Repair Medicine; Guangxi Health Commission Key Laboratory of Basic Science and Prevention of Perioperative Organ Dysfunction, Nanning 530021, China.

<sup>2</sup> School of Light Industry and Food Engineering, Guangxi University, Nanning 530004, China.

<sup>3</sup> CQM-Centro de Quimica da Madeira, Universidade da Madeira, Campus da Penteada, Funchal 9000-390, Madeira, Portugal.

\*Corresponding authors:

Email: [panlinghui@gxmu.edu.cn](mailto:panlinghui@gxmu.edu.cn) (L.-H. Pan); [zlt1981@126.com](mailto:zlt1981@126.com) (L. Zeng).

## Table of Contents

### Experimental details

**Fig. S1.** <sup>1</sup>H NMR spectra of **RHC** in CDCl<sub>3</sub>-*d* (500 MHz).

**Fig. S2.** <sup>13</sup>C NMR spectra of **RHC** in CDCl<sub>3</sub>-*d* (125 MHz).

**Fig. S3.** HR-MS spectra of **RHC**.

**Fig. S4.** <sup>1</sup>H NMR spectra of **RHC** after reaction with cadaverine in D<sub>2</sub>O (500 MHz).

**Fig. S5.** HR-MS spectra of **RHC** after reaction with cadaverine.

## 1. Experimental details

### 1.1 Spectral analysis

First, **RHC** (5.0 mM) stock solution was prepared by dissolving **RHC** solid in pure DMSO (99.9%). Before measurements, the **RHC** stock solution was diluted with DMSO/PBS buffer solution (pH= 7.4, v/v = 3/7) at room temperature to prepare working solution (10  $\mu$ M). The UV-vis absorption spectra were measured on a spectrophotometer (SHIMADZU UV-800), and fluorescence spectra were recorded on fluorescence spectrometer (Hitachi F-900).  $\lambda_{\text{ex}} = 550$  nm,  $\lambda_{\text{em}} = 592$  nm, slits: 2/2 nm.

### 1.2 Cell Culture and Cytotoxicity assay

L929 cells were cultured in DMEM with 10% FBS and penicillin (100 units/mL)-streptomycin (100  $\mu$ g/mL) liquid at 37 °C in a humidified incubator containing 5% CO<sub>2</sub> in air. For cytotoxicity analysis, L929 cells were first seeded in a 96-well plate (Corning, USA) with the density of  $5.0 \times 10^3$  cells/per well.

Cytotoxicity of probe **RHC** was determined using CCK-8 assay in L929 cells. After incubation for 24 h, the 96-well plate was washed with 100  $\mu$ L/well PBS and the L929 cells were incubated with different amount of **RHC** (0, 5, 10, 15, 20, and 25  $\mu$ M) for 24 h. Afterward, the cells were washed with serum-free DMEM once, and then serum-free DMEM containing 10% CCK-8 (100  $\mu$ L) was added to each well and incubated for 1 h. The absorbance ( $\lambda_{\text{abs}} = 450$  nm) was measured on a microplate reader. Cell viability (%) was calculated according to literature.

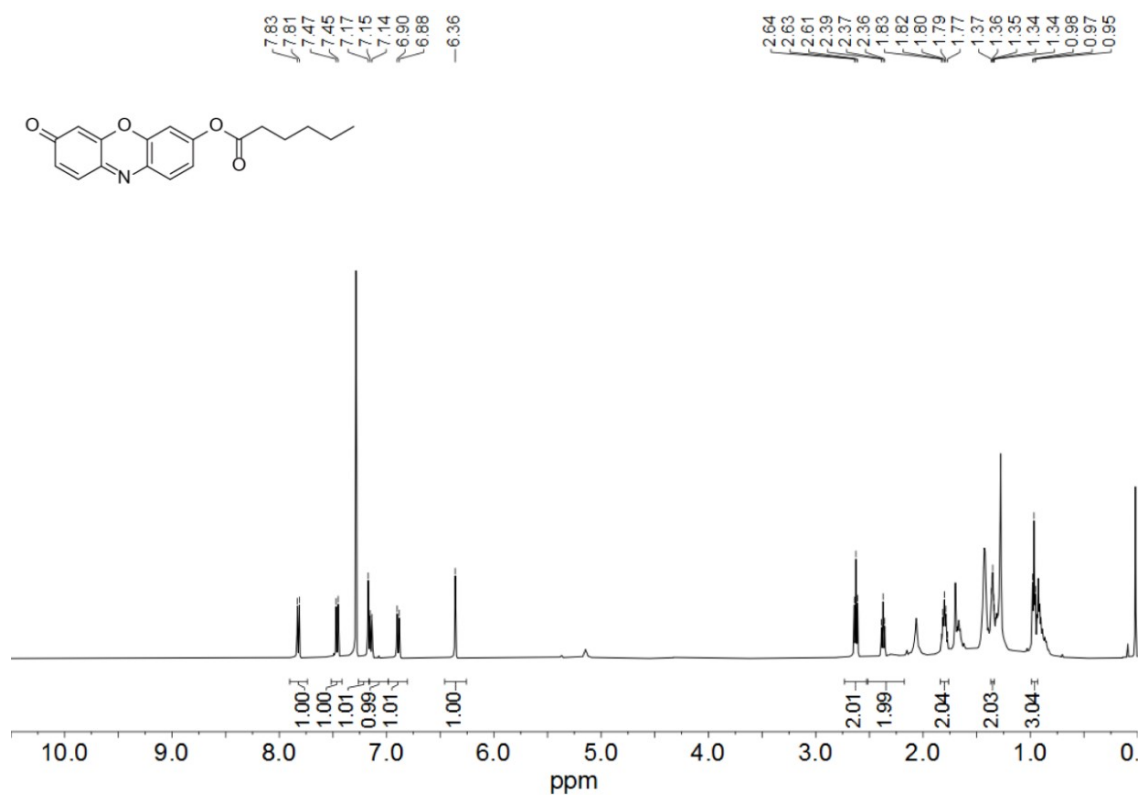

**Fig. S1.** <sup>1</sup>H NMR spectra of **RHC** in CDCl<sub>3</sub>-d (500 MHz).

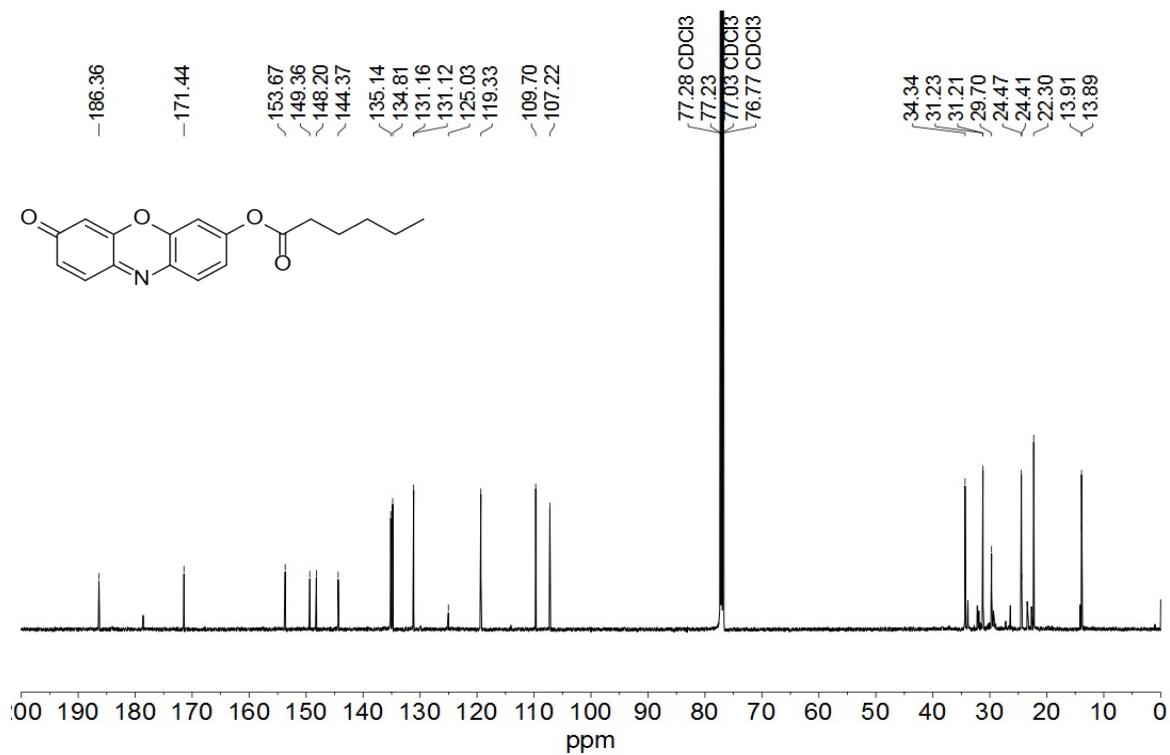

**Fig. S2.** <sup>13</sup>C NMR spectra of **RHC** in CDCl<sub>3</sub>-d (125 MHz).

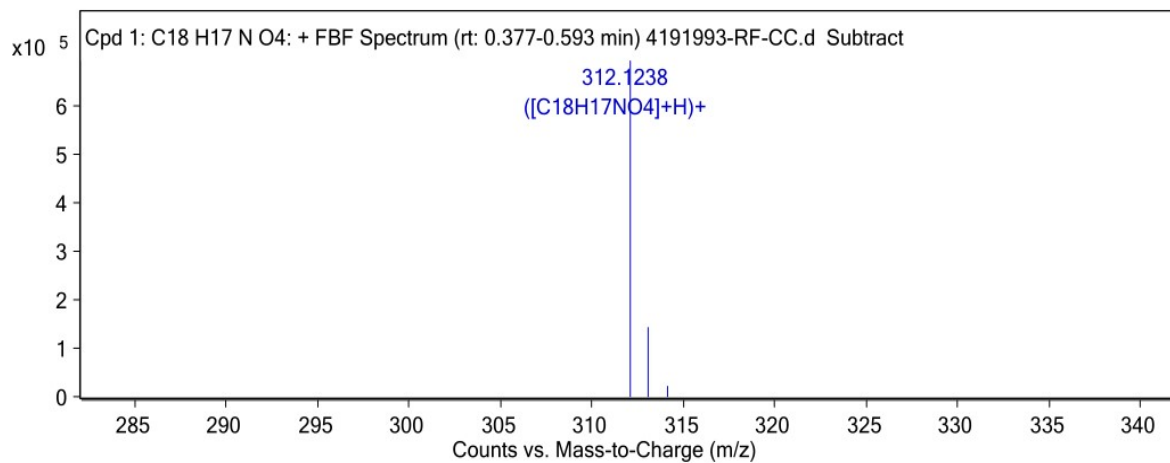

**Fig. S3.** HR-MS spectra of **RHC**.

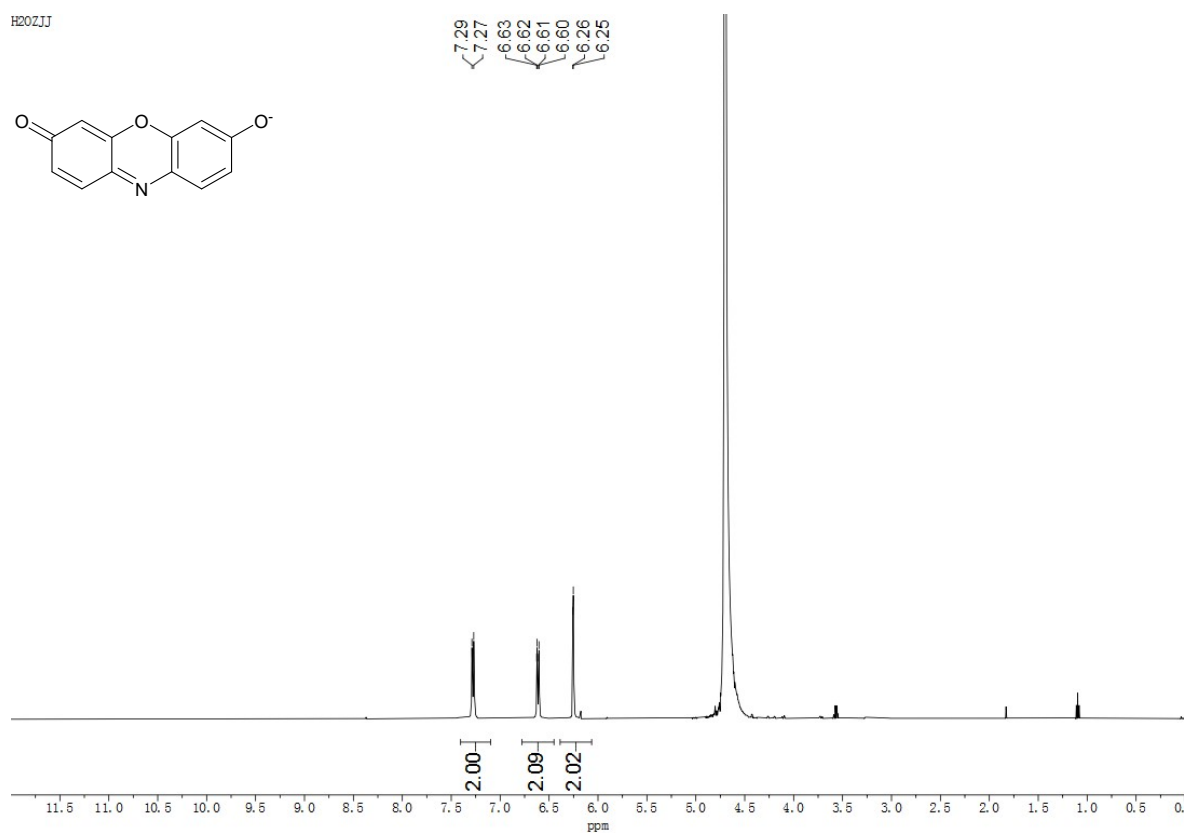

**Fig. S4.** <sup>1</sup>H NMR spectra of **RHC** after reaction with cadaverine in D<sub>2</sub>O (500 MHz).

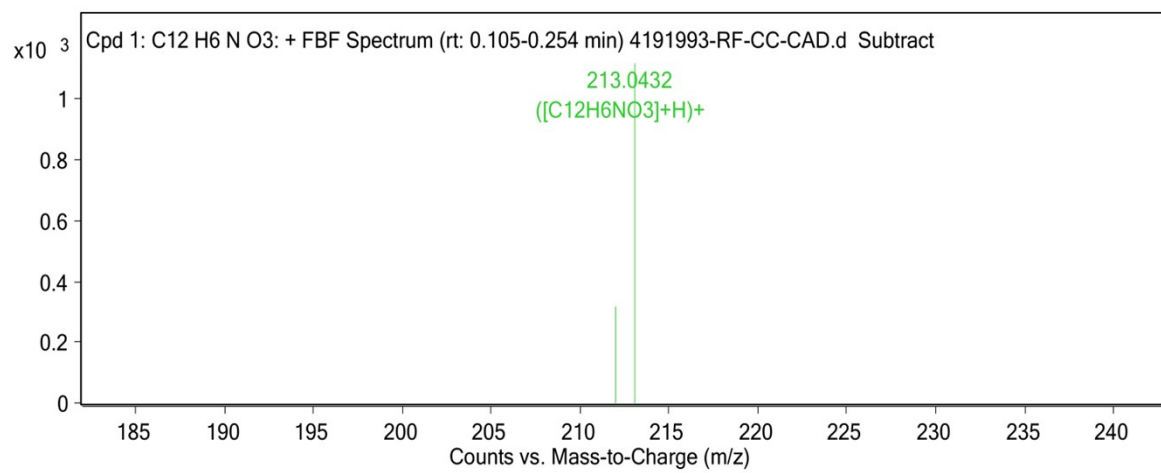

**Fig. S5.** HR-MS spectra of **RHC** after reaction with cadaverine.
